# Supplementary material for: Quest for the Most Aromatic Pathway in Charged Expanded Porphyrins
Source: PubMed Central journal article supplement — Chemistry. 2022 Nov 28;29(6):e202202264. doi: 10.1002/chem.202202264 (PMC10099525; doi:10.1002/chem.202202264), 2022-11-28
Supplement: CHEM-29-0-s001.pdf [file CHEM-29-0-s001.pdf]

# Chemistry–A European Journal

Supporting Information

## Quest for the Most Aromatic Pathway in Charged Expanded Porphyrins

Irene Casademont-Reig, Tatiana Woller, Victor García, Julia Contreras-García,  
William Tiznado, Miquel Torrent-Sucarrat,\* Eduard Matito,\* and Mercedes Alonso\*

# 1 Conformational and topological switches induced by (de)protonation

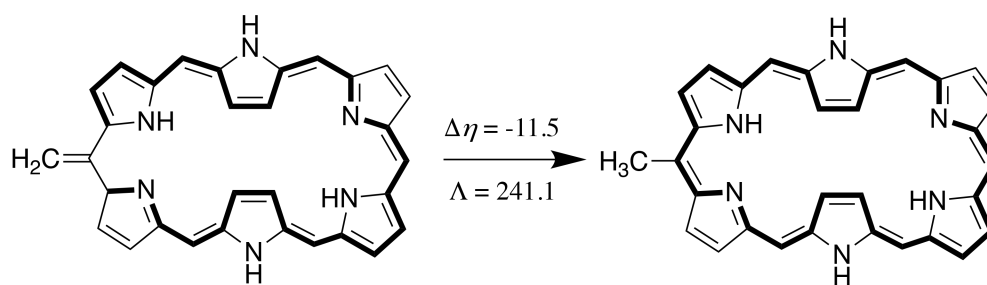

Figure S1: Reaction used to evaluate several global aromaticity descriptors in hexaphyrins.  $\Delta\eta$  is given in  $\text{kcal}\cdot\text{mol}^{-1}$  and  $\Lambda$  in  $\text{ppm}\cdot\text{cgs}$ .

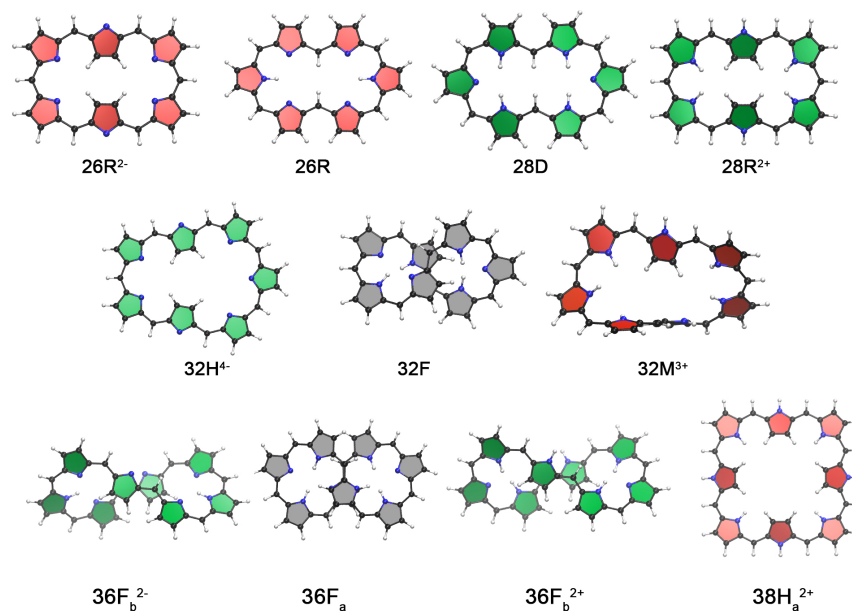

Figure S2: Lowest-energy conformations for neutral and charged hexa-, hepta-, and octaphyrins. Aromatic and antiaromatic macrocycles are colored as red and green, respectively. Nonaromatic macrocycles are colored in grey.

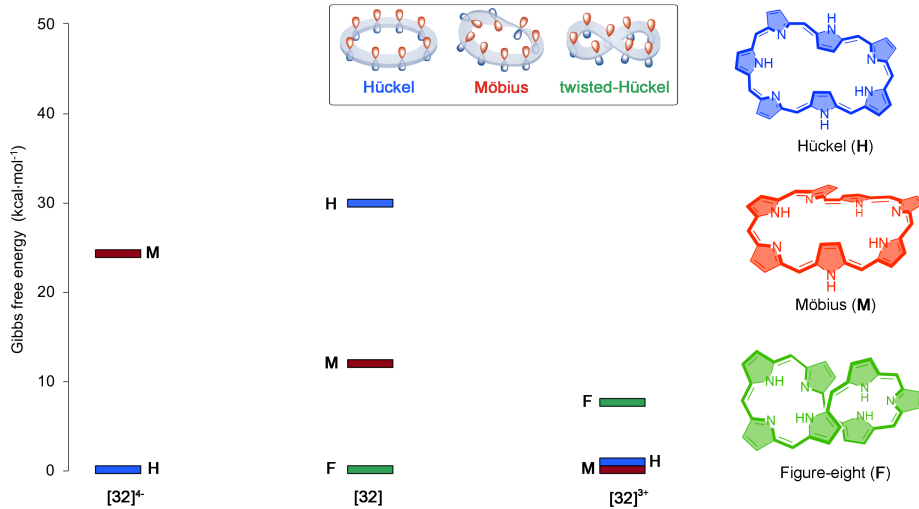

Figure S3: Evolution of the relative Gibbs free energy of selected heptaphyrins with oxidation state upon protonation or deprotonation of the macrocycles.

Table S1: Relative Gibbs free energies (kcal·mol<sup>-1</sup>), hydrogen bond index ( $N_H$ ) and ring strain ( $\Phi_p$  in  $^\circ$ ) of hexaphyrins and heptaphyrins.<sup>a</sup>

| [26]                   | $\Delta G$ | $N_H$ | $\Phi_p$ | [28]                   | $\Delta G$ | $N_H$ | $\Phi_p$ | [32]                   | $\Delta G$ | $N_H$ | $\Phi_p$ |
|------------------------|------------|-------|----------|------------------------|------------|-------|----------|------------------------|------------|-------|----------|
| <b>F</b>               | 17.9       | 3     | 33.4     | <b>F</b>               | 8.8        | 3     | 25.3     | <b>F</b>               | 0.0        | 3.5   | 19.0     |
| <b>M</b>               | 21.5       | 2     | 32.6     | <b>M</b>               | 5.9        | 2.5   | 32.5     | <b>M</b>               | 11.9       | 3     | 34.6     |
| <b>R</b>               | 7.6        | 2     | 12.6     | <b>R</b>               | 7.6        | 2     | 11.0     | <b>H</b>               | 29.8       | 1     | 24.8     |
| <b>D</b>               | 0.0        | 3     | 3.1      | <b>D</b>               | 0.0        | 3     | 11.2     | <b>F</b> <sup>4-</sup> | -          | -     | -        |
| <b>T</b>               | 27.8       | 0     | 26.4     | <b>T</b>               | 28.7       | 0     | 24.1     | <b>M</b> <sup>4-</sup> | 24.2       | 0     | 28.8     |
| <b>F</b> <sup>2-</sup> | 50.3       | 0     | 37.1     | <b>F</b> <sup>2+</sup> | -          | -     | -        | <b>H</b> <sup>4-</sup> | 0.0        | 0     | 0.0      |
| <b>M</b> <sup>2-</sup> | -          | 0     | -        | <b>M</b> <sup>2+</sup> | 3.8        | 0     | 34.4     | <b>F</b> <sup>3+</sup> | 7.5        | 0     | 31.2     |
| <b>R</b> <sup>2-</sup> | 0.0        | 0     | 6.4      | <b>R</b> <sup>2+</sup> | 0.0        | 0     | 17.6     | <b>M</b> <sup>3+</sup> | 0.0        | 0     | 34.7     |
| <b>D</b> <sup>2-</sup> | 27.7       | 0     | 0.0      | <b>D</b> <sup>2+</sup> | 8.1        | 0     | 16.3     | <b>H</b> <sup>3+</sup> | 0.8        | 0     | 24.8     |
| <b>T</b> <sup>2-</sup> | 7.1        | 0     | 24.4     | <b>T</b> <sup>2+</sup> | 9.5        | 0     | 32.8     |                        |            |       |          |

<sup>a</sup> Gibbs free energies at the M06-2X/6-311+G(d,p)//CAM-B3LYP/6-311G(d,p) level of theory.

Table S2: Relative Gibbs free energies (kcal·mol<sup>-1</sup>), hydrogen bond index ( $N_H$ ) and ring strain ( $\Phi_p$  in  $^\circ$ ) of octaphyrins.<sup>a</sup>

| [36]                  | $\Delta G$ | $N_H$ | $\Phi_p$ | [36]                                | $\Delta G$ | $N_H$ | $\Phi_p$ | [38]                                | $\Delta G$ | $N_H$ | $\Phi_p$ | [36]                                | $\Delta G$ | $N_H$ | $\Phi_p$ |
|-----------------------|------------|-------|----------|-------------------------------------|------------|-------|----------|-------------------------------------|------------|-------|----------|-------------------------------------|------------|-------|----------|
| <b>F</b> <sub>a</sub> | 0.0        | 4     | 15.4     | <b>F</b> <sub>a</sub> <sup>2-</sup> | 12.6       | 3     | 15.1     | <b>F</b> <sub>a</sub> <sup>2+</sup> | 2.3        | 0     | 17.7     | <b>F</b> <sub>a</sub> <sup>2+</sup> | 1.5        | 3     | 16.0     |
| <b>F</b> <sub>b</sub> | 14.5       | 3     | 17.7     | <b>F</b> <sub>b</sub> <sup>2-</sup> | 0.0        | 3     | 20.1     | <b>F</b> <sub>b</sub> <sup>2+</sup> | 9.7        | 0     | 24.7     | <b>F</b> <sub>b</sub> <sup>2+</sup> | 0.0        | 3     | 19.8     |
| <b>M</b> <sub>a</sub> | 27.9       | 2.5   | 24.5     | <b>M</b> <sub>a</sub> <sup>2-</sup> | 1.2        | 2.5   | 23.8     | <b>M</b> <sub>a</sub> <sup>2+</sup> | 10.9       | 0     | 26.4     | <b>M</b> <sub>a</sub> <sup>2+</sup> | 4.6        | 2     | 24.8     |
| <b>M</b> <sub>b</sub> | 49.7       | 0     | 30.1     | <b>M</b> <sub>b</sub> <sup>2-</sup> | 21.4       | 0     | 31.2     | <b>M</b> <sub>b</sub> <sup>2+</sup> | 11.0       | 0     | 35.8     | <b>M</b> <sub>b</sub> <sup>2+</sup> | 27.9       | 0     | 31.0     |
| <b>H</b> <sub>a</sub> | 33.4       | 0     | 6.0      | <b>H</b> <sub>a</sub> <sup>2-</sup> | 12.2       | 0     | 3.8      | <b>H</b> <sub>a</sub> <sup>2+</sup> | 0.0        | 0     | 16.7     | <b>H</b> <sub>a</sub> <sup>2+</sup> | 13.7       | 0     | 11.1     |
| <b>H</b> <sub>b</sub> | 49.8       | 0     | 26.7     | <b>H</b> <sub>b</sub> <sup>2-</sup> | 17.4       | 0     | 22.1     | <b>H</b> <sub>b</sub> <sup>2+</sup> | 5.8        | 0     | 27.8     | <b>H</b> <sub>b</sub> <sup>2+</sup> | 31.6       | 0     | 27.6     |

<sup>a</sup> Gibbs free energies at the M06-2X/6-311+G(d,p)//CAM-B3LYP/6-311G(d,p) level of theory.

Table S3: Relative Gibbs free energies (kcal·mol<sup>-1</sup>) and RMSD values of expanded porphyrins optimized with CAM-B3LYP and different basis sets.

| system                   | $\Delta G$    | $\Delta G$    | RMSD     | system                   | $\Delta G$   | $\Delta G$  | RMSD     |
|--------------------------|---------------|---------------|----------|--------------------------|--------------|-------------|----------|
|                          | D3 dispersion | No dispersion |          |                          | 6-311+G(d,p) | 6-311G(d,p) |          |
| <b>26R</b> <sup>2-</sup> | 0             | 0             | 0.017    | <b>28R</b>               | 9.9          | 7.6         | 0.008    |
| <b>26D</b> <sup>2-</sup> | 26.9          | 27.7          | 0.030    | <b>28D</b>               | 0            | 0           | 0.057    |
| <b>26F</b> <sup>2-</sup> | 51.1          | 50.4          | 0.052    | <b>28T</b>               | 30.2         | 28.7        | 0.011    |
| <b>26M</b> <sup>2-</sup> | 5.5           | 7.1           | 0.026    | <b>28M</b>               | 7.4          | 5.9         | 0.015    |
| <b>26M</b> <sup>2-</sup> | <i>a</i>      | <i>a</i>      | <i>a</i> | <b>28F</b>               | 10.3         | 8.8         | 0.017    |
| <b>28R</b> <sup>2+</sup> | 0             | 0             | 0.107    | <b>32F</b> <sup>4-</sup> | <i>a</i>     | <i>a</i>    | <i>a</i> |
| <b>28M</b> <sup>2+</sup> | 3.5           | 3.8           | 0.143    | <b>32H</b> <sup>4-</sup> | 0            | 0           | 0.017    |
| <b>28T</b> <sup>2+</sup> | 9.8           | 9.5           | 0.022    | <b>32M</b> <sup>4-</sup> | 22.8         | 24.2        | 0.018    |
| <b>28D</b> <sup>2+</sup> | 7.7           | 8.1           | 0.043    |                          |              |             |          |
| <b>28F</b> <sup>2+</sup> | <i>a</i>      | <i>a</i>      | <i>a</i> |                          |              |             |          |

<sup>a</sup> Those topologies could not be optimized as an energy minimum since the conformation changes upon the optimization.

Table S4: Pearson coefficients between several descriptors of aromaticity for unsubstituted expanded porphyrins (n=20).

|                        | $\Delta\eta$        | $\Lambda$          | NICS(0)            | NICS <sub>zz</sub> (1) |
|------------------------|---------------------|--------------------|--------------------|------------------------|
| $\Delta\eta$           | 1                   |                    |                    |                        |
| $\Lambda$              | -0.672 <sup>a</sup> | 1                  |                    |                        |
| NICS(0)                | -0.641 <sup>a</sup> | 0.915 <sup>a</sup> | 1                  |                        |
| NICS <sub>zz</sub> (1) | -0.670 <sup>a</sup> | 0.962 <sup>a</sup> | 0.923 <sup>a</sup> | 1                      |

<sup>a</sup> The correlation is significant at the 0.01 level (two-tailed).

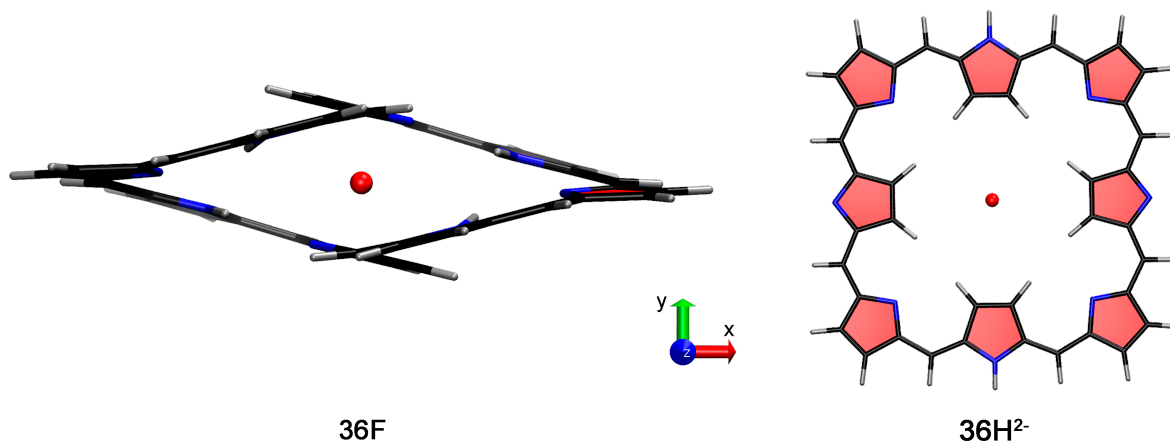

Figure S4: Orientation of the twisted-Hückel and Hückel octaphyrin structures employed in the calculation of the NICS-based indices. The magnetic field is oriented along the z axis.

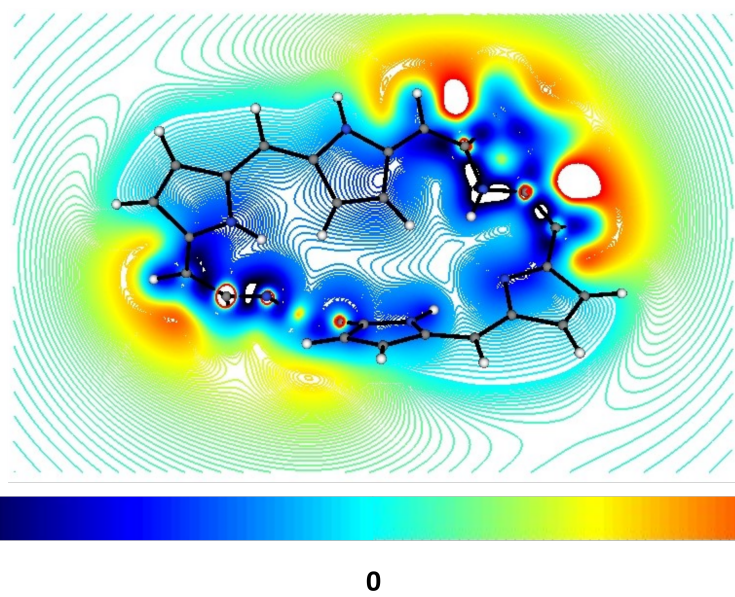

Figure S5: 2D-NICS<sub>zz</sub>(1) plots (in ppm) of the magnetic shielding of **28M** in the xy plane 1Å situated above the molecular plane.

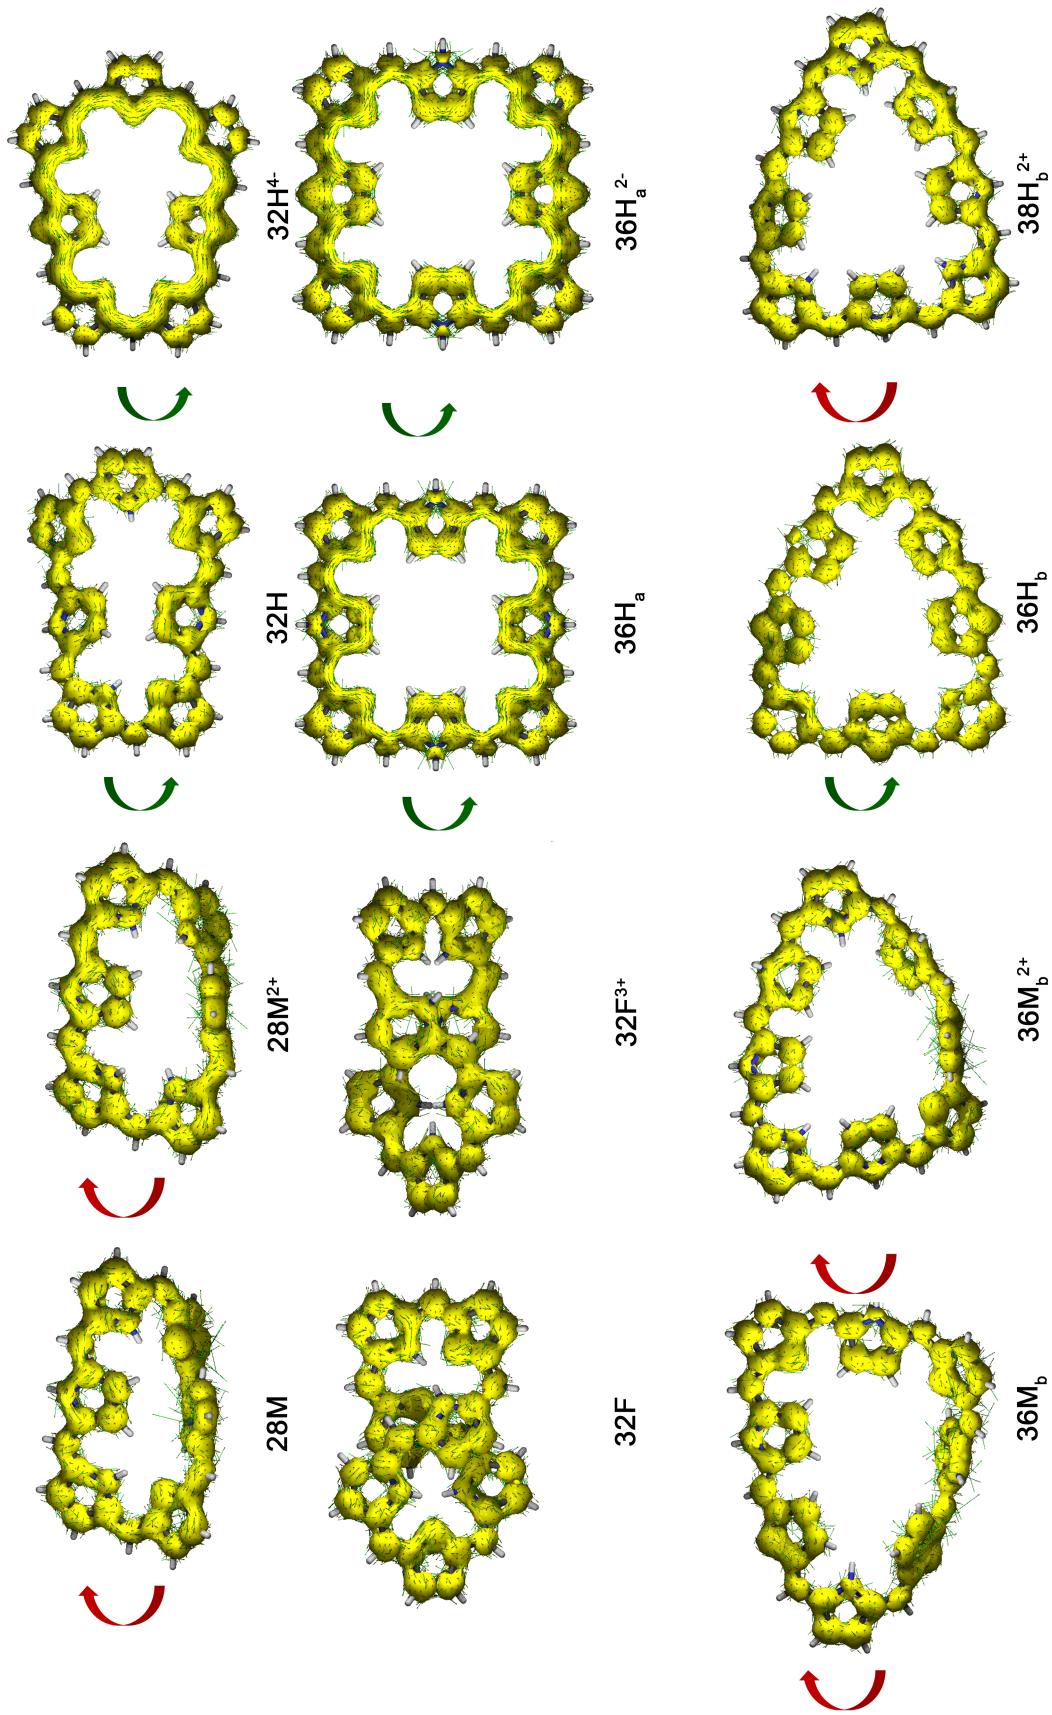

Figure S6: AICD plots of selected neutral, protonated, and deprotonated expanded porphyrins (28M, 28M<sup>2+</sup>, 32H, 32H<sup>4-</sup>, 32F, 32F<sup>3+</sup>, 36H<sub>a</sub>, 36H<sub>a</sub><sup>2-</sup>, 36M<sub>b</sub>, 36M<sub>b</sub><sup>2+</sup>, 36H<sub>b</sub>, and 38H<sub>b</sub><sup>2+</sup>) (isovalue of 0.06 au).

## 2 Magnetically induced currents in neutral and charged expanded porphyrins

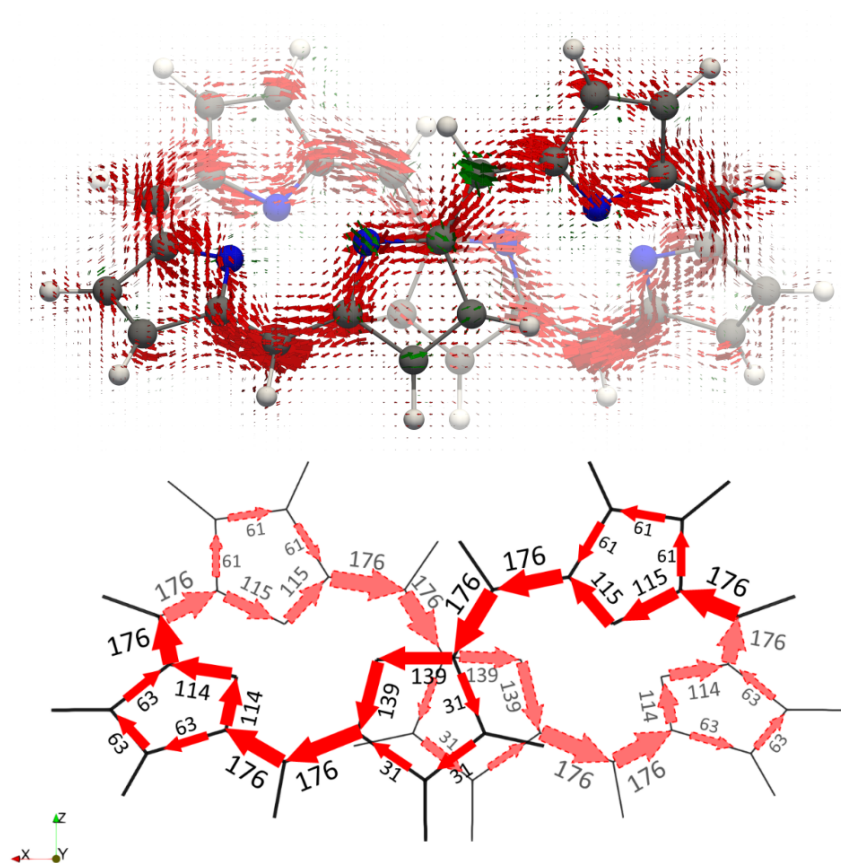

Figure S7: Visualization of the current density plots using a vector representation in  $26\mathbf{F}^{2-}$ . The percentage ratios are with respect to the net bond current strength in pyrrole ( $11.8 \text{ nA}\cdot\text{T}^{-1}$ ). The external magnetic field is parallel to the symmetry  $z$  axis. The percentage ratios are with respect to the net bond current strength in pyrrole ( $11.8 \text{ nA}\cdot\text{T}^{-1}$ ).

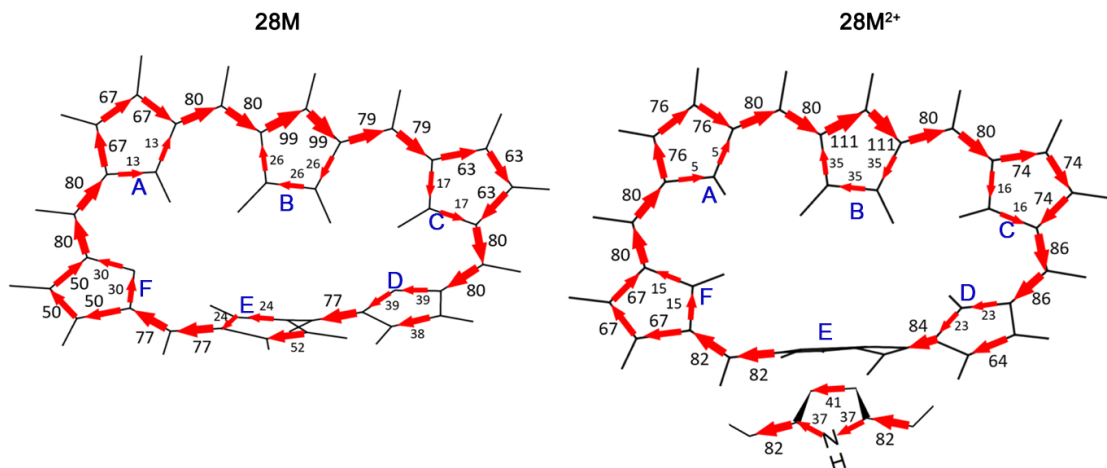

Figure S8: Percentage ratios of the current strength in **28M** and **28M<sup>2+</sup>** with respect to the net bond current strength in pyrrole (11.8 nA·T<sup>-1</sup>).

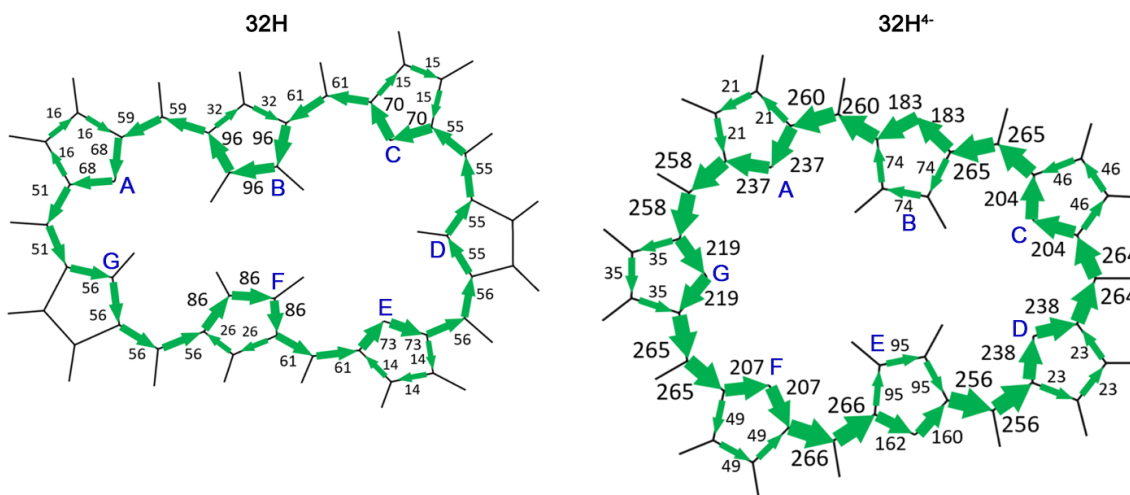

Figure S9: Percentage ratios of the current strength in **32H** and **32H<sup>4-</sup>** with respect to the net bond current strength in pyrrole (11.8 nA·T<sup>-1</sup>).



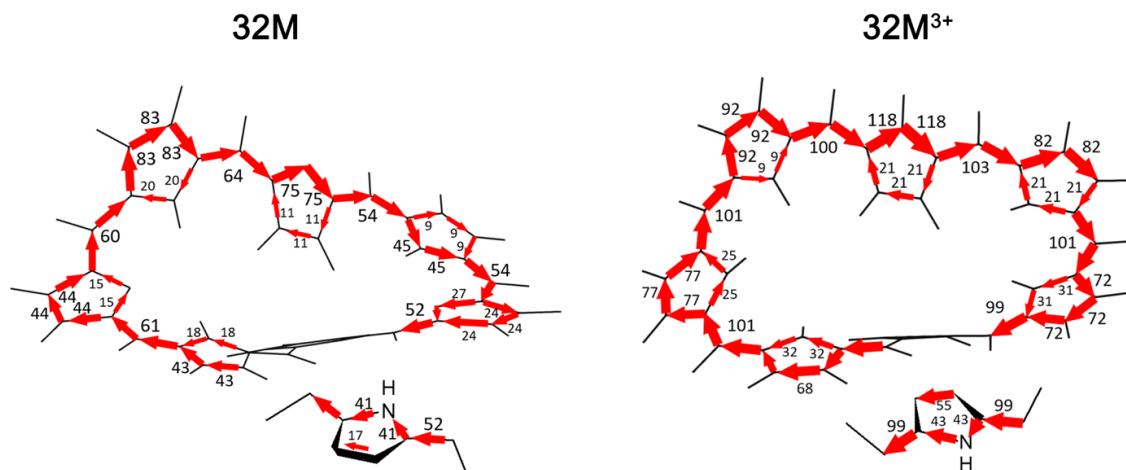

Figure S10: Percentage ratios of the current strength in **32M** and **32M<sup>3+</sup>** with respect to the net bond current strength in pyrrole ( $11.8 \text{ nA}\cdot\text{T}^{-1}$ ).

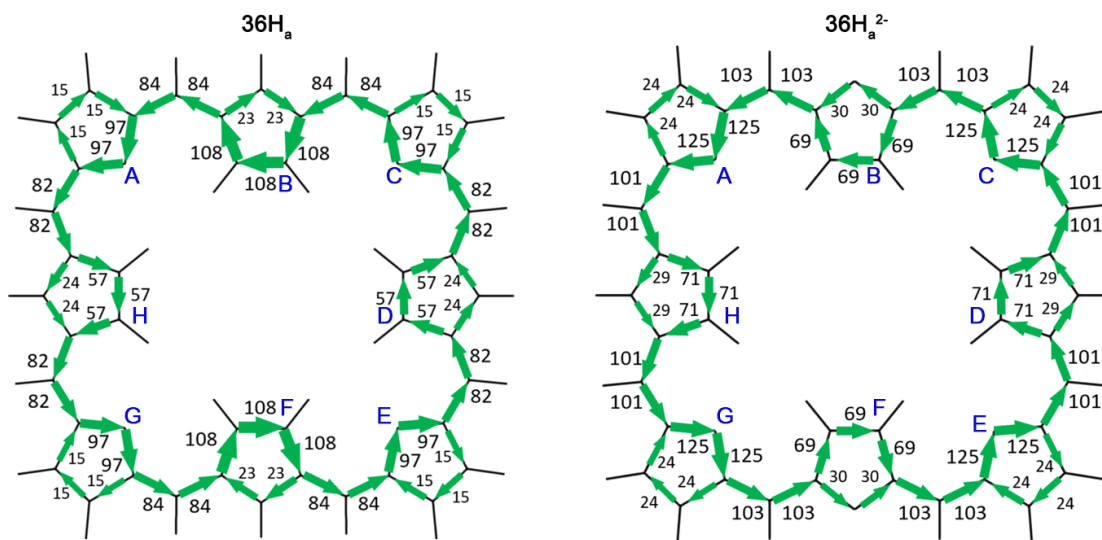

Figure S11: Percentage ratios of the current strength in **36H<sub>a</sub>** and **36H<sub>a</sub><sup>2-</sup>** with respect to the net bond current strength in pyrrole ( $11.8 \text{ nA}\cdot\text{T}^{-1}$ ).

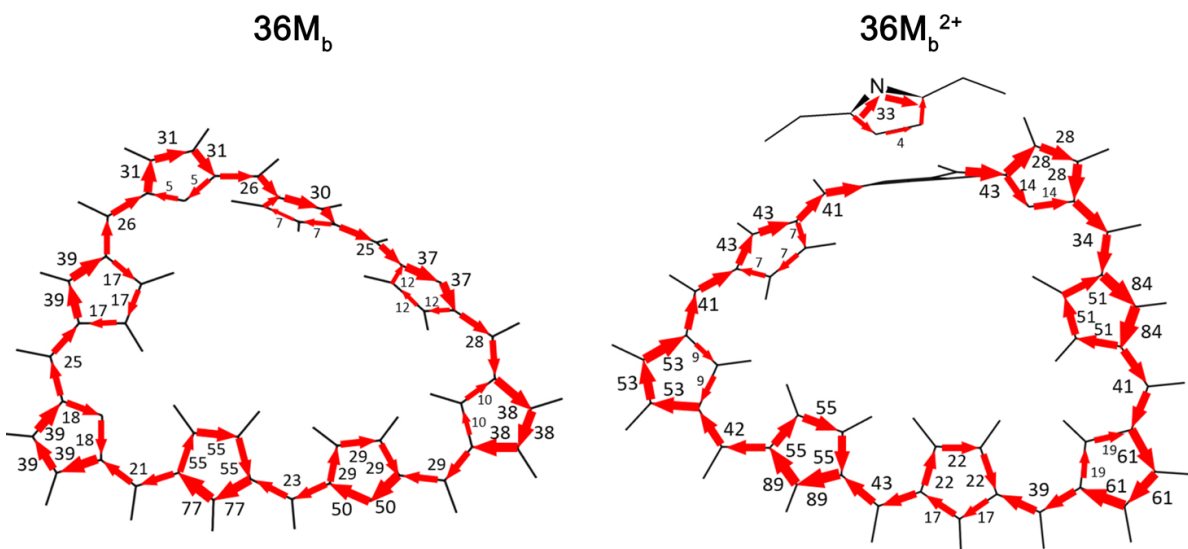

Figure S12: Percentage ratios of the current strength in  $36M_b$  and  $36M_b^{2+}$  with respect to the net bond current strength in pyrrole ( $11.8 \text{ nA}\cdot\text{T}^{-1}$ ).

### 3 Local aromaticity indices in neutral and charged expanded porphyrins

Table S5: Evolution of the aromaticity indices for the annulene pathway of expanded porphyrins upon the protonation of the macrocycle.<sup>a</sup>

| system                              | $\pi e^-$ | FLU   | BOA   | HOMA  | BLA   | AV1245 | $AV_{min}$ |
|-------------------------------------|-----------|-------|-------|-------|-------|--------|------------|
| <b>28R</b>                          | 28        | 0.021 | 0.300 | 0.620 | 0.067 | 1.31   | 0.42       |
| <b>28R<sup>2+</sup></b>             | 28        | 0.020 | 0.264 | 0.682 | 0.051 | 1.07   | 0.16       |
| <b>28M</b>                          | 28        | 0.018 | 0.269 | 0.677 | 0.059 | 1.45   | 0.60       |
| <b>28M<sup>2+</sup></b>             | 28        | 0.018 | 0.253 | 0.718 | 0.048 | 1.14   | 0.01       |
| <b>32F</b>                          | 32        | 0.020 | 0.292 | 0.632 | 0.065 | 1.28   | 0.39       |
| <b>32F<sup>3+</sup></b>             | 32        | 0.020 | 0.251 | 0.695 | 0.048 | 1.15   | 0.15       |
| <b>32M</b>                          | 32        | 0.020 | 0.292 | 0.664 | 0.065 | 1.40   | 0.53       |
| <b>32M<sup>3+</sup></b>             | 32        | 0.017 | 0.234 | 0.749 | 0.045 | 1.17   | 0.00       |
| <b>36M<sub>b</sub></b>              | 36        | 0.025 | 0.330 | 0.582 | 0.076 | 1.16   | 0.35       |
| <b>36M<sub>b</sub><sup>2+</sup></b> | 38        | 0.024 | 0.313 | 0.593 | 0.069 | 1.48   | 0.15       |
| <b>36H<sub>b</sub></b>              | 36        | 0.025 | 0.323 | 0.579 | 0.076 | 1.15   | 0.21       |
| <b>38H<sub>b</sub><sup>2+</sup></b> | 38        | 0.019 | 0.250 | 0.702 | 0.024 | 1.48   | 0.04       |

<sup>a</sup> All indices were calculated at the CAM-B3LYP/6-311+G(d,p) level of theory.

Table S6: Evolution of the aromaticity indices for the inner pathway of expanded porphyrins upon the protonation of the macrocycle.<sup>a</sup>

| system                              | $\pi e^-$ | FLU   | BOA   | HOMA  | BLA   | AV1245 | $AV_{min}$ |
|-------------------------------------|-----------|-------|-------|-------|-------|--------|------------|
| <b>28R</b>                          | 24        | 0.020 | 0.251 | 0.719 | 0.054 | 0.07   | 0.03       |
| <b>28R<sup>2+</sup></b>             | 24        | 0.020 | 0.219 | 0.735 | 0.043 | -0.07  | 0.05       |
| <b>28M</b>                          | 24        | 0.016 | 0.215 | 0.784 | 0.043 | 0.13   | 0.01       |
| <b>28M<sup>2+</sup></b>             | 24        | 0.019 | 0.217 | 0.750 | 0.041 | -0.16  | 0.01       |
| <b>32F</b>                          | 28        | 0.017 | 0.238 | 0.759 | 0.053 | 0.38   | 0.02       |
| <b>32F<sup>3+</sup></b>             | 28        | 0.020 | 0.227 | 0.732 | 0.044 | 0.11   | 0.10       |
| <b>32M</b>                          | 28        | 0.018 | 0.238 | 0.765 | 0.051 | 0.33   | 0.01       |
| <b>32M<sup>3+</sup></b>             | 28        | 0.018 | 0.211 | 0.783 | 0.038 | 0.10   | 0.00       |
| <b>36M<sub>b</sub></b>              | 32        | 0.024 | 0.287 | 0.662 | 0.064 | 0.43   | 0.04       |
| <b>36M<sub>b</sub><sup>2+</sup></b> | 32        | 0.022 | 0.259 | 0.701 | 0.057 | 0.16   | 0.03       |
| <b>36H<sub>b</sub></b>              | 32        | 0.024 | 0.286 | 0.662 | 0.064 | 0.43   | 0.00       |
| <b>38H<sub>b</sub><sup>2+</sup></b> | 32        | 0.018 | 0.208 | 0.783 | 0.038 | -0.34  | 0.02       |

<sup>a</sup> All indices were calculated at the CAM-B3LYP/6-311+G(d,p) level of theory.

Table S7: Evolution of the aromaticity indices for the outer pathway of expanded porphyrins upon the protonation of the macrocycle.<sup>a</sup>

| system                              | $\pi e^-$ | FLU   | BOA   | HOMA  | BLA   | AV1245 | $AV_{min}$ |
|-------------------------------------|-----------|-------|-------|-------|-------|--------|------------|
| <b>28R</b>                          | 30        | 0.026 | 0.324 | 0.487 | 0.069 | 1.45   | 0.08       |
| <b>28R<sup>2+</sup></b>             | 30        | 0.022 | 0.295 | 0.604 | 0.063 | 1.59   | 0.20       |
| <b>28M</b>                          | 30        | 0.024 | 0.311 | 0.515 | 0.067 | 1.48   | 0.04       |
| <b>28M<sup>2+</sup></b>             | 30        | 0.020 | 0.283 | 0.642 | 0.059 | 1.67   | 0.22       |
| <b>32F</b>                          | 35        | 0.027 | 0.330 | 0.443 | 0.070 | 1.39   | 0.01       |
| <b>32F<sup>3+</sup></b>             | 35        | 0.021 | 0.156 | 0.613 | 0.060 | 1.54   | 0.12       |
| <b>32M</b>                          | 35        | 0.026 | 0.324 | 0.475 | 0.069 | 1.41   | 0.06       |
| <b>32M<sup>3+</sup></b>             | 35        | 0.019 | 0.267 | 0.684 | 0.055 | 1.63   | 0.20       |
| <b>36M<sub>b</sub></b>              | 40        | 0.032 | 0.362 | 0.315 | 0.079 | 1.14   | 0.03       |
| <b>36M<sub>b</sub><sup>2+</sup></b> | 40        | 0.027 | 0.323 | 0.464 | 0.057 | 0.16   | 0.03       |
| <b>36H<sub>b</sub></b>              | 40        | 0.032 | 0.363 | 0.300 | 0.080 | 1.12   | 0.02       |
| <b>38H<sub>b</sub><sup>2+</sup></b> | 40        | 0.019 | 0.003 | 0.665 | 0.000 | 1.87   | 0.27       |

<sup>a</sup> All indices were calculated at the CAM-B3LYP/6-311+G(d,p) level of theory.

Table S8: Evolution of the aromaticity indices for the annulene pathway of expanded porphyrins upon deprotonation of the macrocycles.<sup>a</sup>

| system                              | $\pi e^-$ | FLU   | BOA   | HOMA  | BLA   | AV1245 | $AV_{min}$ |
|-------------------------------------|-----------|-------|-------|-------|-------|--------|------------|
| <b>26R</b>                          | 26        | 0.019 | 0.278 | 0.716 | 0.065 | 1.56   | 0.60       |
| <b>26R<sup>2-</sup></b>             | 26        | 0.017 | 0.218 | 0.659 | 0.057 | 1.58   | 0.38       |
| <b>26F</b>                          | 26        | 0.023 | 0.317 | 0.619 | 0.074 | 1.27   | 0.35       |
| <b>26F<sup>2-</sup></b>             | 26        | 0.015 | 0.124 | 0.720 | 0.044 | 1.66   | 0.66       |
| <b>32M</b>                          | 32        | 0.020 | 0.292 | 0.664 | 0.065 | 1.40   | 0.53       |
| <b>32M<sup>4-</sup></b>             | 32        | 0.023 | 0.261 | 0.450 | 0.066 | 1.30   | 0.02       |
| <b>32H</b>                          | 32        | 0.022 | 0.309 | 0.611 | 0.070 | 1.21   | 0.42       |
| <b>32H<sup>4-</sup></b>             | 32        | 0.024 | 0.280 | 0.423 | 0.071 | 1.11   | 0.01       |
| <b>36H<sub>a</sub></b>              | 36        | 0.022 | 0.304 | 0.636 | 0.068 | 1.21   | 0.40       |
| <b>36H<sub>a</sub><sup>2-</sup></b> | 34        | 0.020 | 0.265 | 0.659 | 0.067 | 1.36   | 0.54       |

<sup>a</sup> All indices were calculated at the CAM-B3LYP/6-311+G(d,p) level of theory.

Table S9: Evolution of the aromaticity indices for the inner pathway of expanded porphyrins upon deprotonation.<sup>a</sup>

| system                               | $\pi e^-$ | FLU   | BOA   | HOMA  | BLA   | AV1245 | AV <sub>min</sub> |
|--------------------------------------|-----------|-------|-------|-------|-------|--------|-------------------|
| <b>26R</b>                           | 24        | 0.017 | 0.250 | 0.785 | 0.057 | 1.05   | 0.12              |
| <b>26R</b> <sup>2-</sup>             | 24        | 0.009 | 0.142 | 0.888 | 0.045 | 1.73   | 1.23              |
| <b>26F</b>                           | 24        | 0.020 | 0.281 | 0.712 | 0.067 | 0.86   | 0.43              |
| <b>26F</b> <sup>2-</sup>             | 24        | 0.006 | 0.018 | 0.971 | 0.029 | 1.83   | 1.54              |
| <b>32M</b>                           | 28        | 0.018 | 0.238 | 0.765 | 0.051 | 0.33   | 0.01              |
| <b>32M</b> <sup>4-</sup>             | 28        | 0.010 | 0.137 | 0.840 | 0.044 | 0.86   | 0.21              |
| <b>32H</b>                           | 28        | 0.020 | 0.258 | 0.730 | 0.056 | 0.40   | 0.01              |
| <b>32H</b> <sup>4-</sup>             | 28        | 0.012 | 0.175 | 0.793 | 0.052 | 0.82   | 0.09              |
| <b>36H<sub>a</sub></b>               | 32        | 0.020 | 0.260 | 0.738 | 0.056 | 0.56   | 0.03              |
| <b>36H<sub>a</sub></b> <sup>2-</sup> | 32        | 0.017 | 0.219 | 0.773 | 0.049 | 0.93   | 0.11              |

<sup>a</sup> All indices were calculated at the CAM-B3LYP/6-311+G(d,p) level of theory.

Table S10: Evolution of the aromaticity indices for the outer pathway of expanded porphyrins upon deprotonation.<sup>a</sup>

| system                               | $\pi e^-$ | FLU   | BOA   | HOMA  | BLA   | AV1245 | AV <sub>min</sub> |
|--------------------------------------|-----------|-------|-------|-------|-------|--------|-------------------|
| <b>26R</b>                           | 30        | 0.031 | 0.351 | 0.346 | 0.078 | 1.02   | 0.01              |
| <b>26R</b> <sup>2-</sup>             | 30        | 0.031 | 0.334 | 0.286 | 0.077 | 1.13   | 0.01              |
| <b>26F</b>                           | 30        | 0.034 | 0.369 | 0.256 | 0.080 | 1.00   | 0.00              |
| <b>26F</b> <sup>2-</sup>             | 30        | 0.029 | 0.296 | 0.345 | 0.069 | 1.25   | 0.18              |
| <b>32M</b>                           | 35        | 0.026 | 0.324 | 0.475 | 0.069 | 1.41   | 0.06              |
| <b>32M</b> <sup>4-</sup>             | 35        | 0.028 | 0.311 | 0.305 | 0.070 | 1.51   | 0.02              |
| <b>32H</b>                           | 35        | 0.029 | 0.348 | 0.389 | 0.077 | 1.25   | 0.01              |
| <b>32H</b> <sup>4-</sup>             | 35        | 0.029 | 0.322 | 0.280 | 0.072 | 1.47   | 0.01              |
| <b>36H<sub>a</sub></b>               | 40        | 0.030 | 0.351 | 0.360 | 0.076 | 1.20   | 0.04              |
| <b>36H<sub>a</sub></b> <sup>2-</sup> | 40        | 0.027 | 0.314 | 0.456 | 0.068 | 1.70   | 0.22              |

<sup>a</sup> All indices were calculated at the CAM-B3LYP/6-311+G(d,p) level of theory.

Table S11: Aromaticity indices of the three most delocalized circuits of anionic expanded porphyrins.<sup>a</sup>

| system                               | Circuit <sup>b</sup> | $\pi e^-$ | FLU   | BOA   | HOMA  | BLA   | AV1245 | AV <sub>min</sub> |
|--------------------------------------|----------------------|-----------|-------|-------|-------|-------|--------|-------------------|
| <b>26R</b> <sup>2-</sup>             | iiiiii               | 24        | 0.009 | 0.142 | 0.888 | 0.045 | 1.73   | 1.23              |
| <b>26R</b> <sup>2-</sup>             | iiiiio               | 25        | 0.012 | 0.167 | 0.812 | 0.047 | 1.78   | 0.59              |
| <b>26R</b> <sup>2-</sup>             | oiiiiio              | 26        | 0.015 | 0.19  | 0.741 | 0.048 | 1.82   | 0.59              |
| <b>26F</b> <sup>2-</sup>             | iiiiii               | 24        | 0.006 | 0.018 | 0.971 | 0.029 | 1.83   | 1.53              |
| <b>26F</b> <sup>2-</sup>             | iiiiio               | 25        | 0.010 | 0.074 | 0.841 | 0.037 | 1.74   | 0.66              |
| <b>26F</b> <sup>2-</sup>             | iiiioio              | 26        | 0.014 | 0.124 | 0.732 | 0.044 | 1.66   | 0.63              |
| <b>32H</b> <sup>4-</sup>             | iooioio              | 32        | 0.021 | 0.26  | 0.503 | 0.060 | 1.16   | 0.19              |
| <b>32H</b> <sup>4-</sup>             | ioiioio              | 31        | 0.021 | 0.256 | 0.516 | 0.064 | 0.96   | 0.19              |
| <b>32H</b> <sup>4-</sup>             | ioioiio              | 30        | 0.021 | 0.254 | 0.531 | 0.068 | 0.73   | 0.19              |
| <b>32M</b> <sup>4-</sup>             | oiooooo              | 32        | 0.020 | 0.234 | 0.535 | 0.056 | 1.54   | 0.35              |
| <b>32M</b> <sup>4-</sup>             | oiooioo              | 32        | 0.019 | 0.23  | 0.543 | 0.055 | 1.53   | 0.35              |
| <b>32M</b> <sup>4-</sup>             | oiooioi              | 31        | 0.019 | 0.225 | 0.565 | 0.059 | 1.34   | 0.35              |
| <b>36H<sub>a</sub></b> <sup>2-</sup> | iiiioiio             | 34        | 0.020 | 0.265 | 0.659 | 0.067 | 1.36   | 0.54              |
| <b>36H<sub>a</sub></b> <sup>2-</sup> | iiiioioo             | 35        | 0.021 | 0.284 | 0.628 | 0.068 | 1.29   | 0.54              |
| <b>36H<sub>a</sub></b> <sup>2-</sup> | ioioioio             | 36        | 0.023 | 0.302 | 0.599 | 0.069 | 1.23   | 0.54              |

<sup>a</sup> All indices were calculated at the CAM-B3LYP/6-311+G(d,p) level of theory.

<sup>b</sup> i denotes the inner route (C-N-C) and o the outer route (C-C) in a pyrrole ring. The labelling of the conjugation pathway starts from the top right five-membered ring.

Table S12: Aromaticity indices of the three most delocalized circuits of cationic expanded porphyrins.<sup>a</sup>

| system                               | Circuit <sup>b</sup> | $\pi e^-$ | FLU   | BOA   | HOMA  | BLA   | AV1245 | AV <sub>min</sub> |
|--------------------------------------|----------------------|-----------|-------|-------|-------|-------|--------|-------------------|
| <b>28R</b> <sup>2+</sup>             | oooooo               | 30        | 0.022 | 0.295 | 0.604 | 0.063 | 1.59   | 0.20              |
| <b>28R</b> <sup>2+</sup>             | iooooo               | 29        | 0.021 | 0.263 | 0.642 | 0.174 | 1.34   | 0.16              |
| <b>28M</b> <sup>2+</sup>             | oooooo               | 30        | 0.020 | 0.283 | 0.642 | 0.059 | 1.67   | 0.22              |
| <b>28M</b> <sup>2+</sup>             | ooioooo              | 29        | 0.019 | 0.266 | 0.685 | 0.052 | 1.46   | 0.20              |
| <b>32F</b> <sup>3+</sup>             | ioooooo              | 32        | 0.017 | 0.232 | 0.761 | 0.039 | 1.38   | 0.20              |
| <b>32F</b> <sup>3+</sup>             | iooioooo             | 33        | 0.018 | 0.25  | 0.713 | 0.045 | 1.38   | 0.21              |
| <b>32F</b> <sup>3+</sup>             | ioooooo              | 34        | 0.020 | 0.273 | 0.655 | 0.054 | 1.41   | 0.17              |
| <b>32M</b> <sup>3+</sup>             | ooiooio              | 32        | 0.016 | 0.222 | 0.787 | 0.036 | 1.25   | 0.28              |
| <b>32M</b> <sup>3+</sup>             | ooiooio              | 33        | 0.017 | 0.235 | 0.760 | 0.042 | 1.43   | 0.32              |
| <b>32M</b> <sup>3+</sup>             | ooioooo              | 34        | 0.018 | 0.252 | 0.724 | 0.049 | 1.52   | 0.24              |
| <b>36M<sub>b</sub></b> <sup>2+</sup> | oooooio              | 38        | 0.024 | 0.313 | 0.593 | 0.069 | 1.48   | 0.15              |
| <b>36M<sub>b</sub></b> <sup>2+</sup> | ooooiio              | 37        | 0.025 | 0.313 | 0.577 | 0.072 | 1.28   | 0.15              |
| <b>36M<sub>b</sub></b> <sup>2+</sup> | ooioiio              | 36        | 0.021 | 0.285 | 0.674 | 0.060 | 1.12   | 0.12              |
| <b>38H<sub>b</sub></b> <sup>2+</sup> | oooooooo             | 40        | 0.019 | 0.266 | 0.665 | 0.055 | 1.87   | 0.27              |
| <b>38H<sub>b</sub></b> <sup>2+</sup> | oooioooo             | 39        | 0.018 | 0.249 | 0.716 | 0.048 | 1.73   | 0.21              |
| <b>38H<sub>b</sub></b> <sup>2+</sup> | ooooooooio           | 39        | 0.018 | 0.249 | 0.708 | 0.048 | 1.71   | 0.19              |

<sup>a</sup> All indices were calculated at the CAM-B3LYP/6-311+G(d,p) level of theory.

<sup>b</sup> i denotes the inner route (C-N-C) and o the outer route (C-C). The labelling of the conjugation pathway starts from the top right five-membered ring, except for 32M and 36M in which the first labelled five-membered ring corresponds to the top left one.

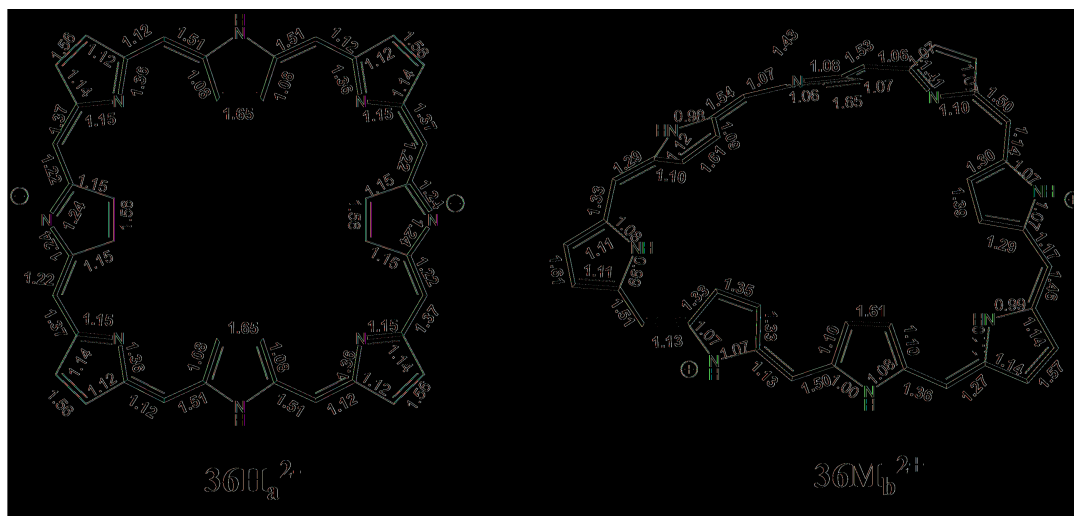

Figure S13: Delocalization indices (DIs) for  $36M_a^{2-}$  and  $36M_b^{2+}$  macrocycles computed at the CAM-B3LYP/6-311G(d,p) level of theory. The main conjugation pathway is depicted with bold bonds.

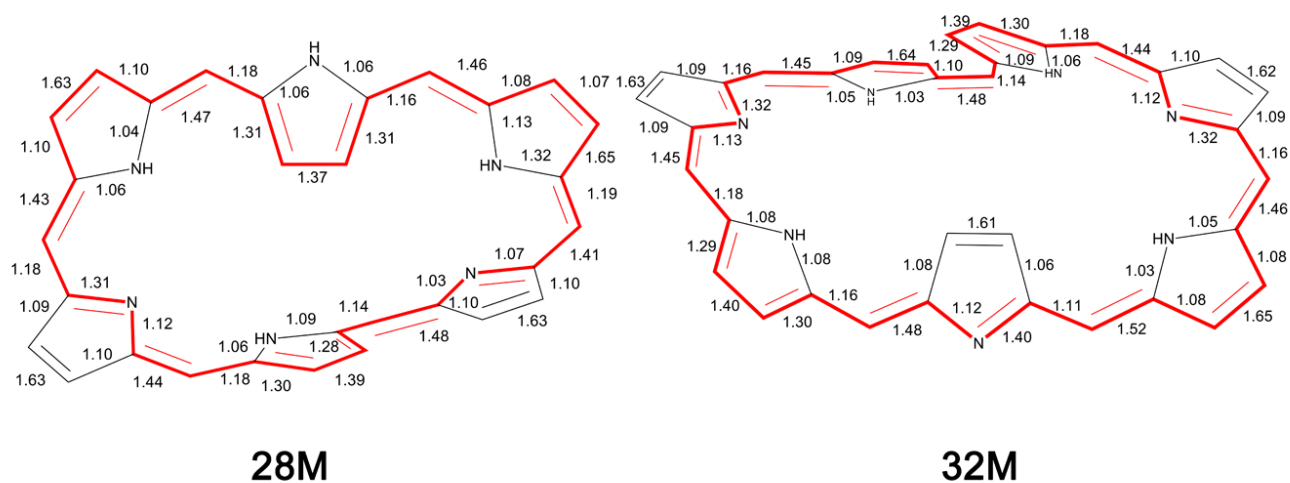

Figure S14: Delocalization indices (DIs) for  $28M$  and  $32M$  macrocycles computed at the CAM-B3LYP/6-311G(d,p) level of theory. The main conjugation pathway is depicted with bold red bonds.

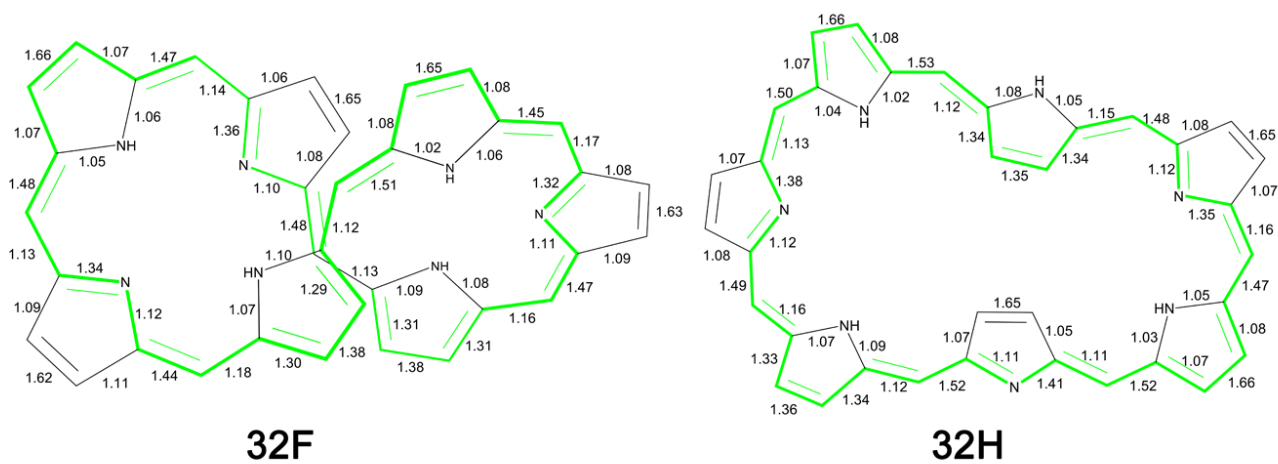

Figure S15: Delocalization indices (DIs) for **32F** and **32H** macrocycles computed at the CAM-B3LYP/6-311G(d,p) level of theory. The main conjugation pathway is depicted with bold bonds.

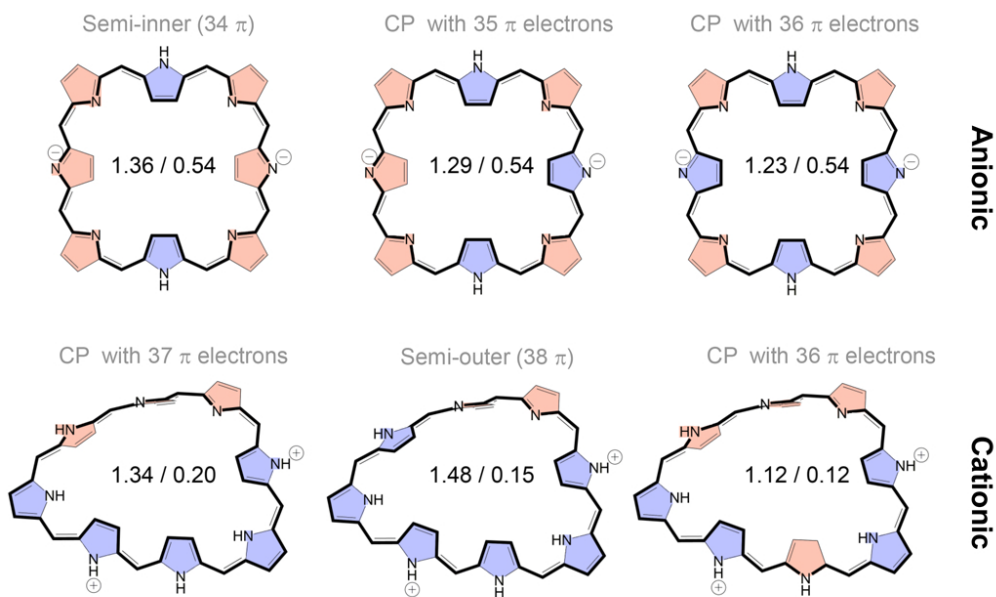

Figure S16: Illustration of the most delocalized pathways in  $\mathbf{36H}_a^{2-}$  and  $\mathbf{36M}_b^{2+}$ .

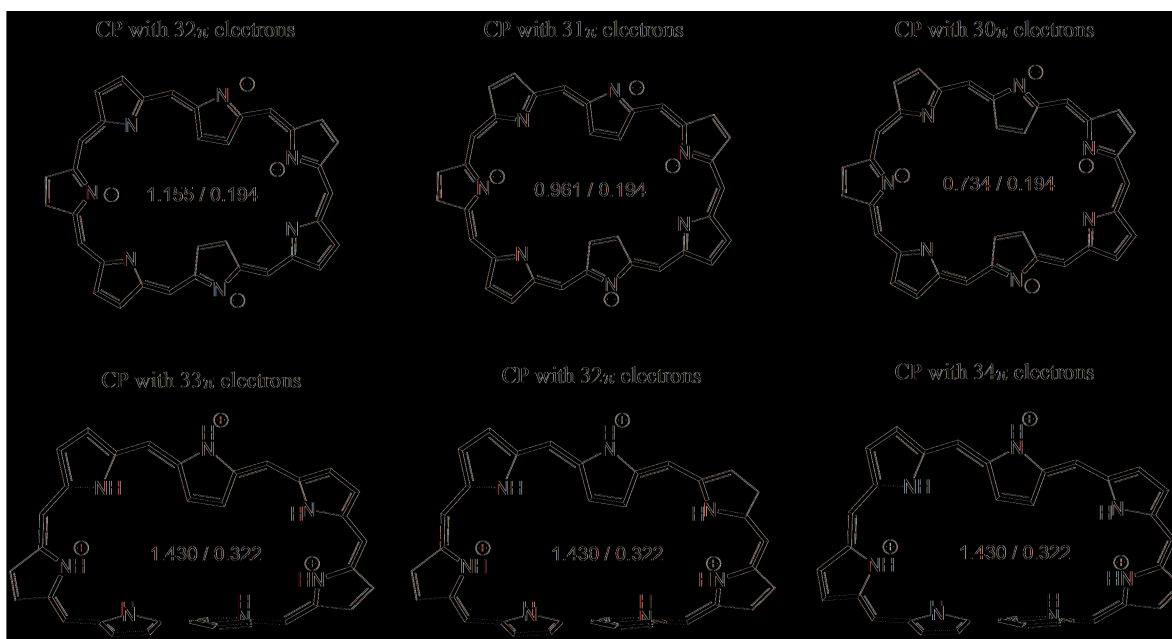

Figure S17: Illustration of the most delocalized pathways in  $32\text{H}^{4-}$  and  $32\text{M}^{3+}$ .

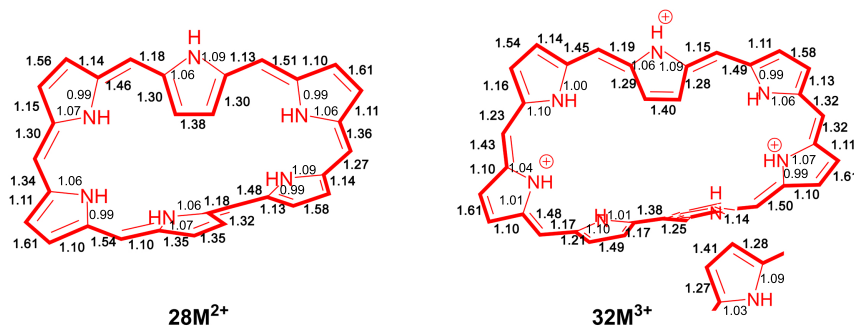

Figure S18: Delocalization indices (DIs) for  $28\text{M}^{2+}$  and  $32\text{M}^{3+}$  macrocycles computed at the CAM-B3LYP/6-311G(d,p) level of theory. The main conjugation pathway is depicted with bold bonds.

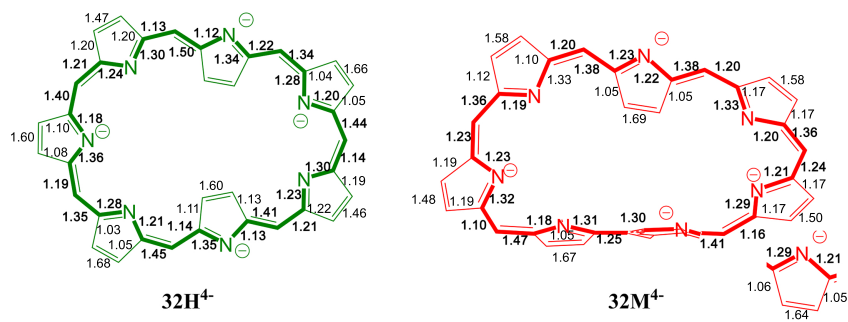

Figure S19: Delocalization indices (DIs) for  $32\text{H}^{4-}$  and  $32\text{M}^{4-}$  macrocycles computed at the CAM-B3LYP/6-311G(d,p) level of theory. The main conjugation pathway is depicted with bold bonds.



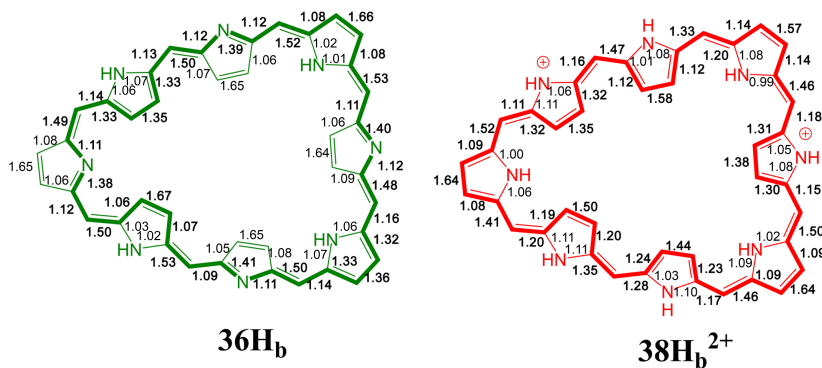

Figure S20: Delocalization indices (DIs) for **36H<sub>b</sub>** and **38H<sub>b</sub><sup>2+</sup>** macrocycles computed at the CAM-B3LYP/6-311G(d,p) level of theory. The main conjugation pathway is depicted with bold bonds.

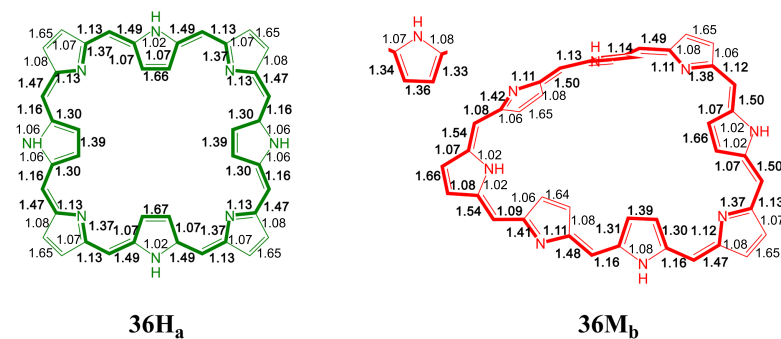

Figure S21: Delocalization indices (DIs) for **36H<sub>a</sub>** and **36M<sub>b</sub>** macrocycles computed at the CAM-B3LYP/6-311G(d,p) level of theory. The main conjugation pathway is depicted with bold bonds.
